# Supplementary material
Source: MDPI journal article supplement (https://www.mdpi.com/2073-4344/11/5/626)
Supplement: s1 [file s1 › catalysts-1189057-supplementary.pdf]

# Supporting Information

## Photoelectrochemical Water Oxidation by Cobalt Cytochrome C Integrated-ATO Photoanode

Carla Casadevall<sup>1,2,#,\*</sup>, Haojie Zhang<sup>1</sup>, Shaojiang Chen<sup>1</sup>, Dayn J. Sommer<sup>1</sup>, Dong-Kyun Seo<sup>1,\*</sup>, Giovanna Ghirlanda<sup>1,\*</sup>

<sup>1</sup> School of Molecular Sciences, Arizona State University Tempe, AZ 85287-1604

<sup>2</sup> Institute of Chemical Research of Catalonia (ICIQ), The Barcelona Institute of Science and Technology, Avinguda Països Catalans 16, 43007 Tarragona, Spain

# Present address: Yusuf Hamied Department of Chemistry University of Cambridge, Lensfield Road, CB21EW, Cambridge, United Kingdom

\*Correspondence: ccasadevall@iciq.es; DSeo@asu.edu; Giovanna.Ghirlanda@asu.edu

### 1. Materials and Physical Methods

All chemicals and solvents were purchased from commercial suppliers and used without further purification unless otherwise indicated.

UV-Vis spectra were recorded on a Varian Cary Bio Spectrophotometer. Concentration of Co-cyt c was measured using cyt C's extinction coefficient of  $11580 \text{ M}^{-1}\text{cm}^{-1}$  at 280 nm. ICP-MS data were collected from a Thermo-Finnigan Neptune ICP-MS. FT-IR-ATR data were collected using a Bruker IFS 66v/S instrument equipped with a diamond ATR and KBr beam splitter. Gas analysis was performed in a SRI instruments, Model no. 310C GC with a  $5 \text{ \AA}$  molecular sieve column with a thermal conductivity detector and argon as carrier gas. Calibration curves for  $\text{H}_2$  were made by injecting various volumes of a standard gas mixture containing 1 %  $\text{H}_2$  and 99 %  $\text{N}_2$  onto the GC. Calibration curve for  $\text{O}_2$  was created using various volumes of air.

## 2. Electrochemical studies

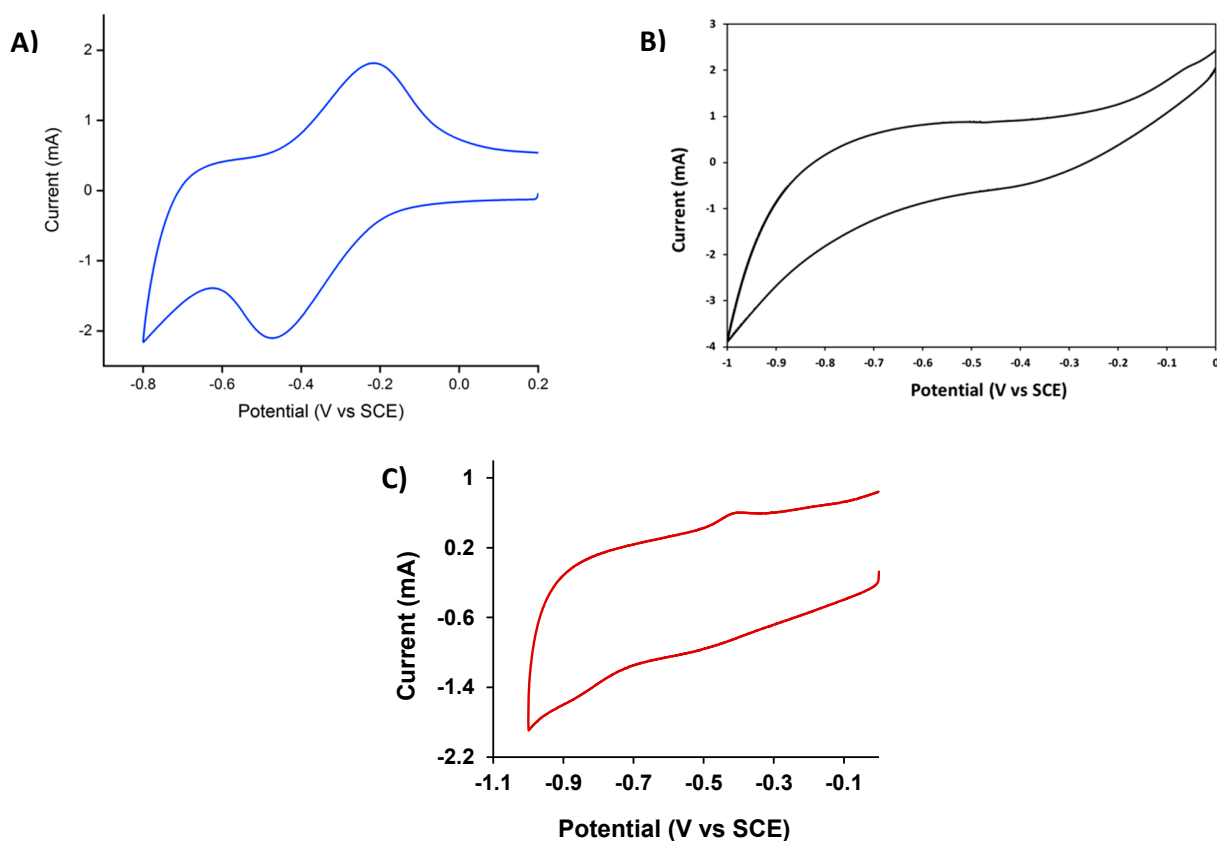

**Figure S1.** Cyclic voltammogram of (A) ATO-Co-cyt C, in 100 mM citrate buffer, 1M  $\text{KNO}_3$ , pH 5.0 at scan rate of  $100 \text{ mV}\cdot\text{S}^{-1}$ , the redox wave at  $-0.34 \text{ V vs SCE}$  ( $-0.39 \text{ V vs RHE}$ ) is assigned to Co (III) to Co(II); (B) blank ATO in the same buffer and scan rate; and (C) Co-cyt c in solution in the same buffer and scan rate, the redox wave at  $-0.43 \text{ V vs SCE}$  ( $-0.48 \text{ V vs RHE}$ ) is assigned to Co (III) to Co(II).

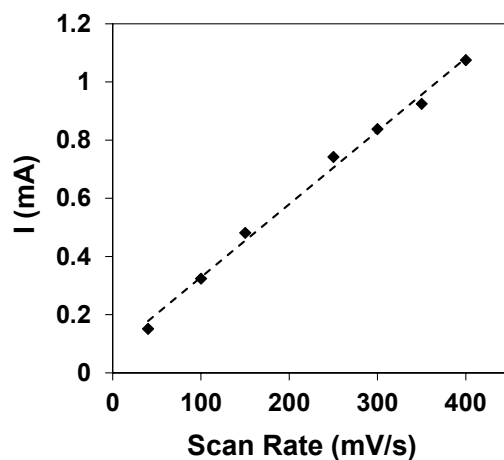

**Figure S2.** Anodic peak current dependence on scan rate for ATO-Co-cyt C, in 100 mM citrate buffer, 1M KNO<sub>3</sub>, pH 5.0 at the following scan rates: 40, 100, 150, 200, 250, 300, 350 and 400 mV·s<sup>-1</sup>.

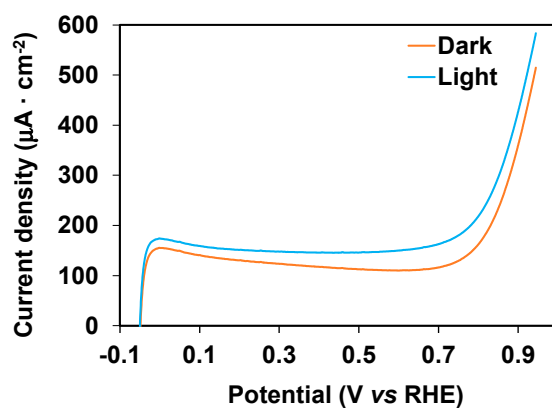

**Figure S3.** Linear sweep voltammograms of the working electrode ATO-Co-cyt c, in the dark (orange line) and under light illumination (blue line) in 100 mM citrate buffer at pH 5.0.

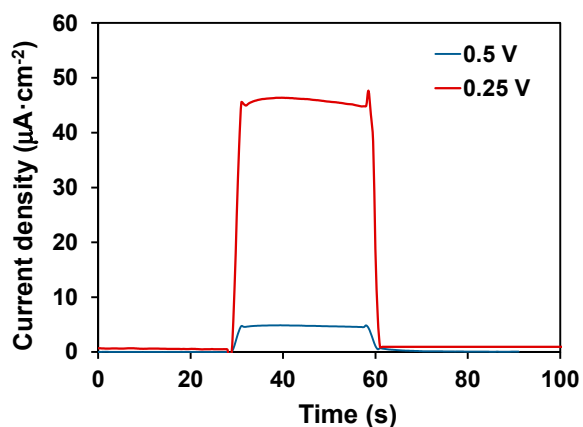

**Figure S4.** Chronoamperometry behavior of ATO-Co-cyt c at 0.5 (blue) and 0.25 V (red) *vs* RHE applied bias in 100 mM citrate buffer at pH 5.0.

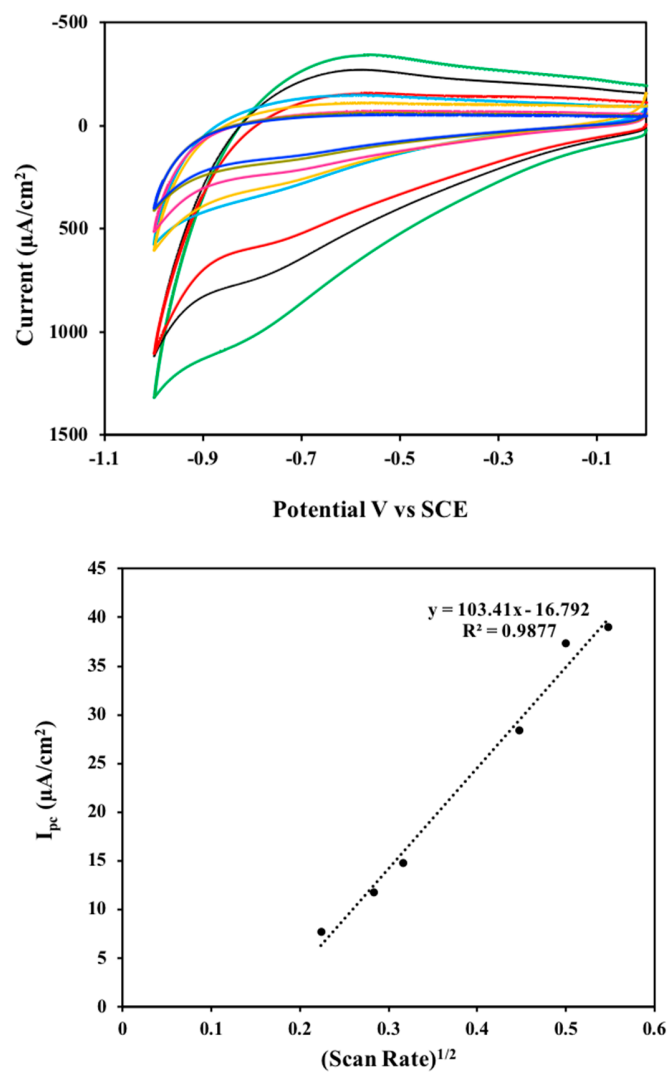

**Figure S5.** (A) Cyclic voltammograms of 5  $\mu\text{M}$  Co-PPIX in 100 mM citrate buffer, 1M  $\text{KNO}_3$ , pH 5.0, at varying scan rates: 50, 80, 100, 200, 250 and 300  $\text{mV}\cdot\text{s}^{-1}$ , respectively. (B) The  $I_{pc}$  vs square root of scan rate obtained from the data in (A) was used to calculate the diffusion coefficient.

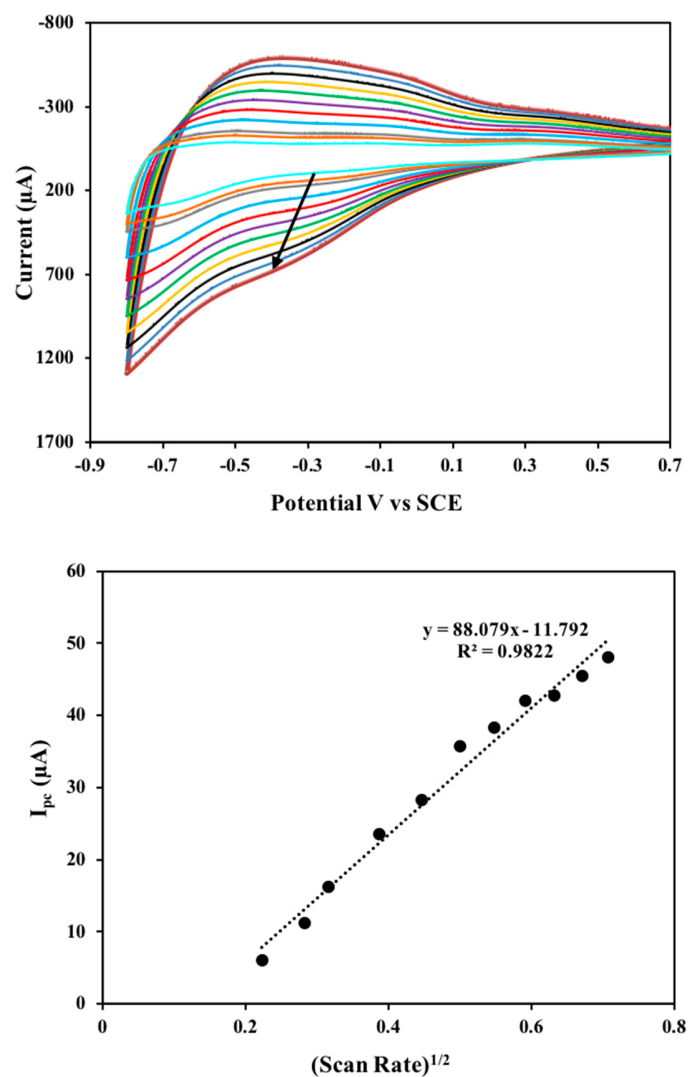

**Figure S6.** (A) Cyclic voltammograms of 5  $\mu\text{M}$  Co-cyt c in 100 mM citrate buffer, 1 M  $\text{KNO}_3$ , pH 5.0, at varying scan rates: 50, 80, 100, 150, 200, 250, 300, 350, 400, 450 and 500  $\text{mV}\cdot\text{s}^{-1}$ , respectively. (B) The  $I_{pc}$  vs square root of scan rate obtained from A was used to calculate the diffusion coefficient.

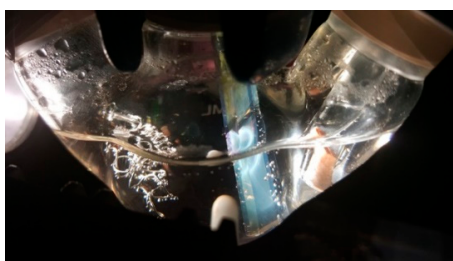

**Figure S7.** Evolution of gas bubbles on the ATO-CocytC working electrode and Pt counter electrode upon illumination

### 3. Calculation of the Faradic Efficiency

The passed charge carriers through the external circuit were measured with integrating the area under the i-t plot in a 6 h photoelectrochemical water splitting test. Simultaneously, amounts of produced H<sub>2</sub> and O<sub>2</sub> was detected by gas chromatography. The Faradic efficiency was calculated according to the following equation:

$$\eta_{\text{hydrogen}} = \frac{\text{amount of hydrogen (mol)}}{\text{amount of } e/2 \text{ (mol)}}$$

$$\eta_{\text{oxygen}} = \frac{\text{amount of oxygen (mol)}}{\text{amount of } e/4 \text{ (mol)}}$$

The following equation was used to calculate the Induced Photon to Current Efficiency (IPCE):

$$\text{IPCE(\%)} = \frac{\text{Number of electrons generated}}{\text{Number of incident photons}} \times 100$$

Ferrioxalate actinometry experiment was used to calculate the number of incident photons.<sup>[1]</sup> The two solutions required for conducting actinometry are 0.15 M potassium ferrioxalate and 0.1% buffered phenanthroline solution. To prepare the 0.15 M potassium ferrioxalate, 1.3 g of potassium ferrioxalate was dissolved in 18mL of water with 2 mL of 1.0 N H<sub>2</sub>SO<sub>4</sub>. 0.1% buffered phenanthroline was prepared by dissolving 1.12 g of sodium acetate, and 5mg of phenanthroline in 5 mL of 1.0 N H<sub>2</sub>SO<sub>4</sub>.

To conduct the actinometry, 3 mL of potassium ferrioxalate were added in a 1 cm × 1 cm quartz cuvette and irradiated with the Kessil lamp for 1 minute while stirring, and another cuvette was left in the dark as a control. 500 uL of 0.1% buffered phenanthroline solution was added to both cuvettes upon completion of the irradiation, and they allowed to develop in dark for 5 minutes. The absorption for both samples were measured at 510 nm, and the amount of produced Fe<sup>2+</sup> during irradiation was measured using the following equation:

$$[\text{Fe}^{2+}] = \frac{A_{\text{light}} - A_{\text{dark}}}{\epsilon_{510 \text{ nm}} l}$$

The photon flux absorbed by the sample then calculated as previously reported.<sup>[1]</sup>

#### References:

- [1] Scaiano, J. C.; Intermolecular photoreductions of ketones; *Journal of Photochemistry*, 2 (1973/74) 81-118.
